# Supplementary material for: Scalable unitary computing using time-parallelized photonic lattices
Source: publisher site journal article supplement (doi:10.1515/nanoph-2025-0498), 2025-12-04
Supplement: Supplementary file [file j_nanoph-2025-0498_suppl_001.pdf]

## **Supplementary Information for “Scalable Unitary Computing using Time-Parallelized Photonic Lattices”**

Hyunchul Park<sup>1</sup>, Beomjoon Chae<sup>1</sup>, Hyunsoo Jang<sup>2</sup>, Sunkyu Yu<sup>1†</sup>, and Xianji Piao<sup>2\*</sup>

<sup>1</sup>Intelligent Wave Systems Laboratory, Department of Electrical and Computer Engineering,  
Seoul National University, Seoul 08826, Korea

<sup>2</sup>Wave Engineering Laboratory, School of Electrical and Computer Engineering, University of  
Seoul, Seoul 02504, Korea

E-mail address for correspondence: <sup>†</sup>[sunkyu.yu@snu.ac.kr](mailto:sunkyu.yu@snu.ac.kr) (S.Y.), <sup>\*</sup>[piao@uos.ac.kr](mailto:piao@uos.ac.kr) (X.P.)

**Note S1. Fidelity analysis on system size**

### Note S1. Fidelity analysis on system size

Figure S1 shows the scaling behaviours of errors  $\varepsilon$  with respect to  $N$  for different origins of system defects: resonance (Fig. S1a) and lifetime (Fig. S1b) perturbations, resonator radiation loss (Fig. S1c), and the altered zero-field condition of loop couplers (Fig. S1d). We observe scaling behaviours well approximated by power-law fitting (dashed lines in Fig. S1a-d). Notably, the synchronization scheme consistently yields superior fidelity as compared to the serial implementation.

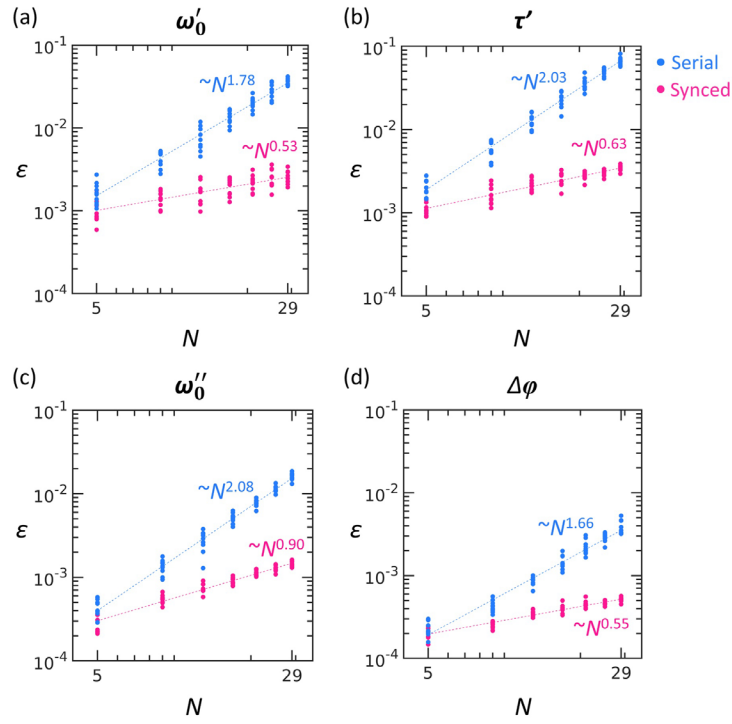

**Fig. S1. Fidelity scaling.** (a-d) Scaling of errors with respect to the system size  $N$ : (a) resonance fluctuations with  $\sigma = 10^{-7}$ , (b) lifetime fluctuations with  $\sigma = 10^{-3}$ , (c) resonator radiation loss with  $\sigma = 10^{-8}$ , and (d) phase-shift defects in loop couplers with  $\sigma = 10^{-5}$ . At each  $N$ , we examine 10 realizations of random Haar matrices. Dashed lines denote the power-law fitting. All the other parameters are the same as those in Fig. 4 in the main text.
